# Supplementary material for: Preparation of Au@Ag core–shell nanoparticle decorated silicon nanowires for bacterial capture and sensing combined with laser induced breakdown spectroscopy and surface-enhanced Raman spectroscopy
Source: Royal Society of Chemistry journal article supplement (doi:10.1039/c9nr00019d), 2019-01-01
Supplement: c9nr00019d1.pdf [file c9nr00019d1.pdf]

**Preparation of Au@Ag core-shell nanoparticles decorated silicon nanowires for bacterial capture and sensing combined with laser induced breakdown spectroscopy and surface-enhanced Raman spectroscopy**

Wenlong Liao,<sup>a</sup> Qingyu Lin,<sup>b</sup> Ya Xu,<sup>b</sup> Enlai Yang,<sup>b</sup> Yixiang Duan<sup>a,c</sup> \*

<sup>a</sup> School of Chemical Engineering, Sichuan University, Chengdu 610065, P.R.China

<sup>b</sup> Research Center of Analytical Instrumentation, Key Laboratory of Bio-resource and Eco-environment, Ministry of Education, College of Life Sciences, Sichuan University, Chengdu 610065, P.R.China

<sup>c</sup> Research Center of Analytical Instrumentation, School of Manufacturing Science and Engineering, Sichuan University, Chengdu 610065, P.R.China.

\* Corresponding Author

Prof. Yixiang Duan, E-mail: [yduan@scu.edu.cn](mailto:yduan@scu.edu.cn)

## **S1 Experiment**

### ***S1.1 Chemicals and Materials.***

Silicon wafer of  $0.8 \times 0.8 \text{ cm}^2$  squares (p-type, resistivity:  $0.01\text{-}0.02 \text{ }\Omega\cdot\text{cm}$ ) was purchased from Suzhou Crystal Silicon Electronic Technology Co., Ltd. (Suzhou, China). Gold chloride hydrates ( $\text{HAuCl}_4 \cdot 3\text{H}_2\text{O}$ ), 3-aminopropyl trimethoxysilane (APTMS), and tris (2-carboxyethyl) phosphine (TCEP) were purchased from Sigma-Aldrich (USA). Silver nitrate ( $\text{AgNO}_3$ ) was purchased from Guangdong Guanghua Sci-Tech Co.,Ltd. (Guangzhou, China). Rhodamine 6G (R6G) was obtained from Aladdin (Shanghai, China). Ascorbic acid (AA), and trisodium citrate were purchased from Chengdu Kelong Chemicals Co., Ltd. (Chengdu, China). *Escherichia coli* 25922 (*E.coli*), *Staphylococcus aureus* (*S. aureus*), and *Salmonella typhimurium* (*S.ty*) were supported by West China No.4 hospital of Sichuan University. Tryptone soy broth (TSB) and tryptone soy agar (TSA) were purchased from Aobox (Beijing, China). Ultrapure water (resistivity,  $18.25 \text{ M}\Omega\cdot\text{cm}$ ) was produced by a laboratory purification system. The aptamer can specifically recognize *S.ty* was synthesized by Sangon Biotech (Shanghai, China) with the sequence of 5'-SH-C6-TAT GGC GGC GTC ACC CGA CGG GGA CTT GAC ATT ATG ACA G-3'.

### ***S1.2 Experimental setup and parameters***

The bacterial detection was performed on a LIBS-Raman combined system and the detail information about this experimental setup can be found in our previous work. A Nd:YAG pulsed laser (Litron Nano, wavelength: 1064 nm; repetition rate: 10 Hz; pulse duration: 4-7 ns) was used as the excitation source for LIBS studies, an Echelle spectrometer (Aryelle 200, LTB) equipped with an ICCD camera (iStar, Andor) was used to record the plasma emission lights. A CW laser (MSL-FN-532, CNI), operating at 532 nm with a typical output power of 400 mW, was used as the excitation source for SERS studies. The scattering signals were delivered into a Raman spectrometer (QE pro, Ocean Optics) through an optical fiber. In this study, LIBS measurements were carried out with laser pulse energy of 30 mJ, a delay time of 1  $\mu\text{s}$  and a gate width of 10  $\mu\text{s}$ , each spectrum was accumulated over 5 laser shots at the same site. While for

SERS measurements, the laser power was attenuated to circa 10 mW by a set of neutral density filters, and the accumulation time was set to 10 s for one spectrum.

### ***S1.3 Bacterial culture***

The pure culture of *S. aureus*, *E. coli* or *S. ty* was grown overnight in 25 mL TSB medium at 37 °C on a rotary shaker at 200 rpm. The bacterial cells were harvested via centrifugation and resuspended in water. The concentrations of bacterial suspension were determined by OD<sub>600</sub> measurement and plate colony counting. The OD<sub>600</sub> values of bacterial stock suspensions were adjusted to 1.0, which corresponded to the concentrations of  $6.0 \times 10^8$ ,  $4.3 \times 10^8$ , and  $6.4 \times 10^8$  CFU/mL for *E. coli*, *S. aureus* and *S. ty*, respectively.

### ***S1.4 Preparation of Au NPs with different particle size***

Au seeds were synthesized by a modified Turkevich method.<sup>1</sup> Typically, 1 mL of 25 mM HAuCl<sub>4</sub> was added into 50 mL of ultrapure water and heated to boil under magnetic stirring, then a certain volume of 1 % trisodium citrate was quickly injected, and the mixed solution was refluxed for 30 min with the color turned to wine-red. After cooling down to room temperature under stirring, the particle concentration of obtained Au NPs can be calculated.<sup>2</sup> Au NPs with different particle size can be obtained by changing the amount of 1 % trisodium citrate. The prepared Au NPs were characterized by UV-Vis spectroscopy and transmission electron microscopy (TEM).

### ***S1.5 Preparation of Si-Au@Ag, SiNWs-Ag and SiNWs-Au***

**SiNWs-Ag:** The Ag NPs were deposited by an electroless deposition technique. The cleaned SiNWs substrates were immersed into 5% HF for 3 min to form Si-H bonds, then SiNWs substrates were subsequently placed into a freshly prepared AgNO<sub>3</sub> (0.005 M)/HF (5 M) aqueous solution for 1 min to synthesize AgNPs in situ on SiNWs substrates. After rinsed with water, the obtained SiNWs-Ag substrates were dried under nitrogen for further use.

**SiNWs-Au:** Firstly, the Au NPs with particle size of ~30 nm were synthesized by the above citrate reduction method. Then, the prepared SiNWs-NH<sub>2</sub> were immersed into 1 mL AuNPs for 12 h. The prepared SiNWs-Au substrates were washed with water and dried under nitrogen for further use.

### ***SI.6 Characterizations***

The OD<sub>600</sub> of bacteria in TSB medium and bacteria suspension were measured by an ultra-micro spectrophotometer (NanoDrop one, Thermo scientific, USA). The SiNWs based substrates were characterized with scanning electron microscopy (SEM) (JSM-7500F, JEOL, Japan). The elemental information of SiNWs-Au@Ag was studied by X-ray photoelectron spectrometer (XPS) (AXIS Ultra DLD, Kratos, UK). The microstructure of SiNWs-Au@Ag was revealed by high resolution transmission electron microscope (HRTEM) (Tecnai G<sup>2</sup> F20 S-TWIN, FEI, USA). The specific surface areas of SiNWs and SiNWs-Au@Ag were measured by the Brunauer–Emmett–Teller (BET) method (Tristar II 3020, Micromeritics, USA). Au@Ag NPs prepared by adding different amount of AgNO<sub>3</sub> were characterized by UV/Vis spectrometer (Lambda 25, PerkinElmer, USA), and the particle size distribution were measured by dynamic light scattering (DLS) (Nano-ZS90, Malvern Zeta Sizer, UK). The morphology of Au@Ag NPs and Apt-SERS tag were characterized with transmission electron microscopy (TEM) (Tecnai G<sup>2</sup> F20 S-TWIN, FEI, USA).

## S2 Tables and Figures

**Table S1.** The vibrational modes assignment of SERS spectra of R6G according to the literatures.<sup>3,4</sup>

| Raman shift (cm-1) | Vibration mode                                                 |
|--------------------|----------------------------------------------------------------|
| 615                | C-C-C ring in-plane bend                                       |
| 778                | C-H out-of-plane bend                                          |
| 1193               | C-H in-plane bend, N-H bend                                    |
| 1312               | In plane xanthene ring breath, N-H bend<br>CH <sub>2</sub> wag |
| 1360               | Xanthene ring stretch, C-H bend                                |
| 1512               | Xanthene ring stretch, C-N stretch, C-H<br>bend                |
| 1574, 1651         | Aromatic C-C stretch                                           |

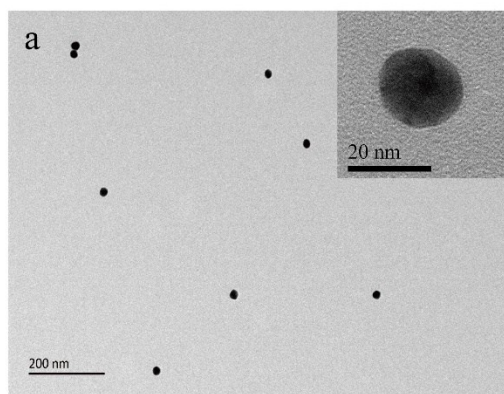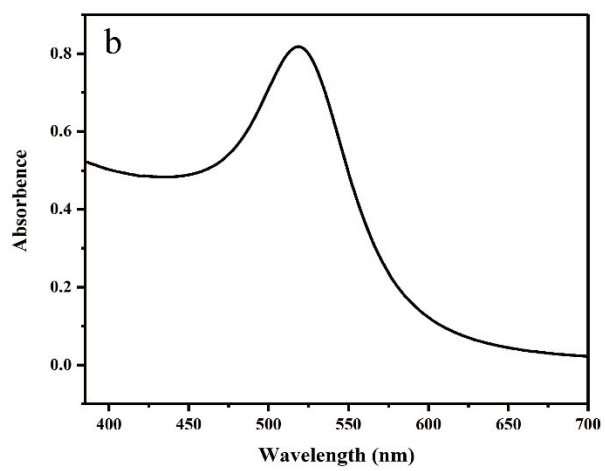

**Fig. S1** TEM image (a) and UV-vis spectrum (b) of Au NPs

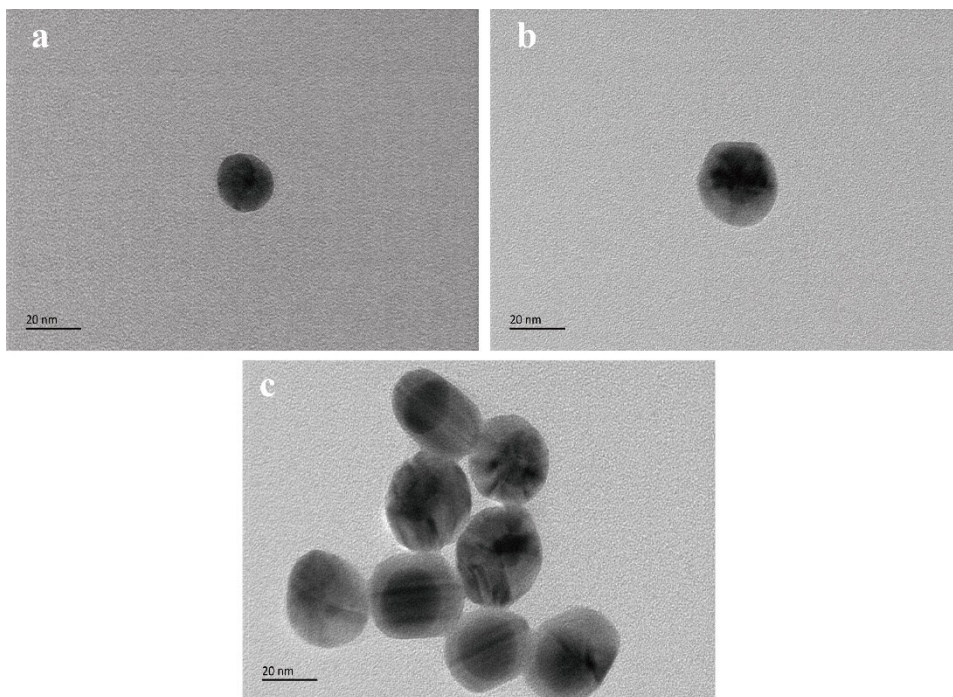

**Fig. S2** TEM images of Au NPs (a), Au@Ag(6) (b), and Au@Ag(10) (c)

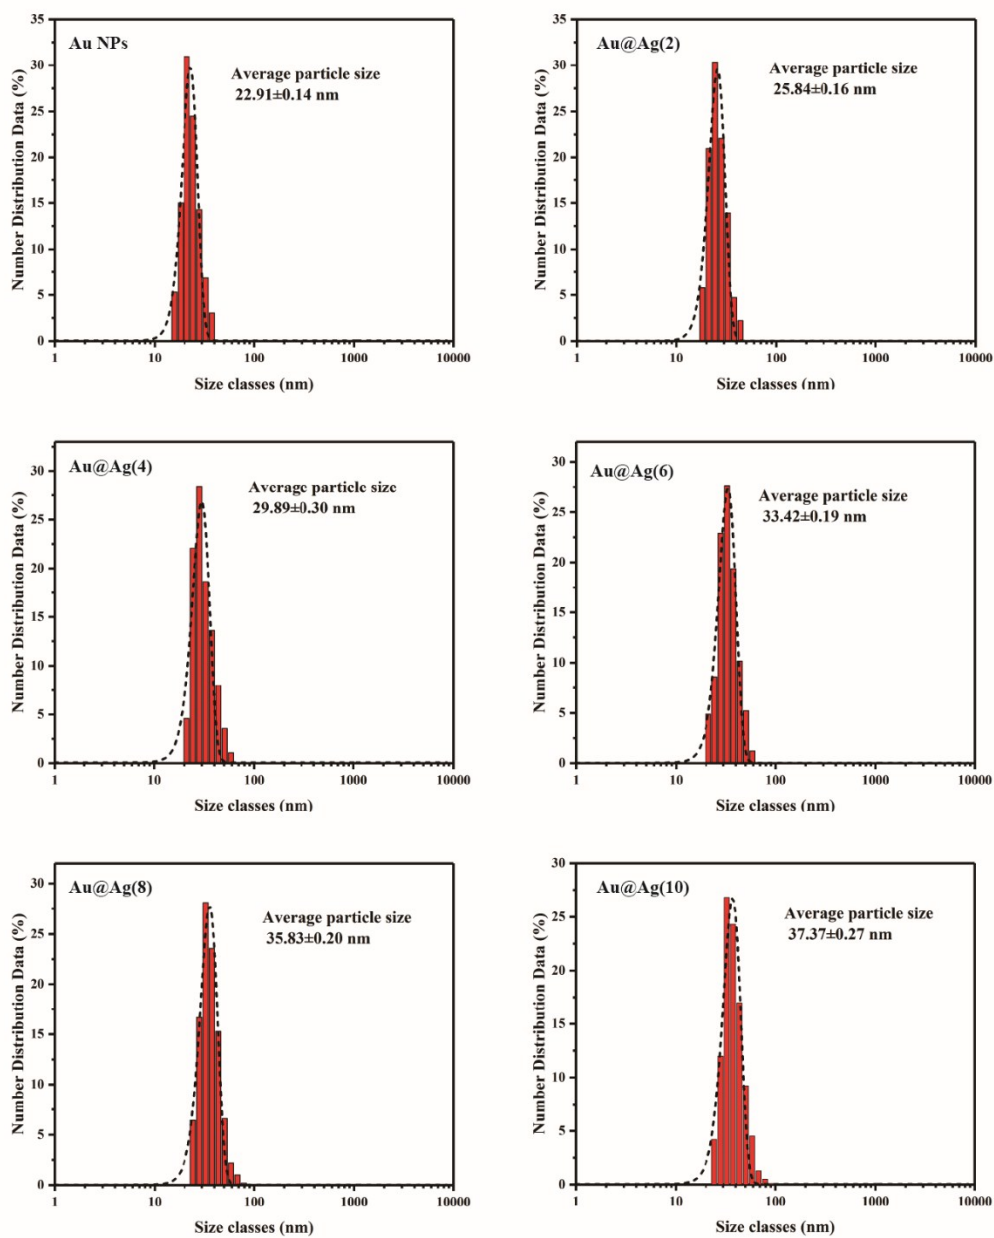

**Fig. S3** The particle size distribution of Au NPs and Au@Ag NPs prepared by adding different amount of AgNO<sub>3</sub>



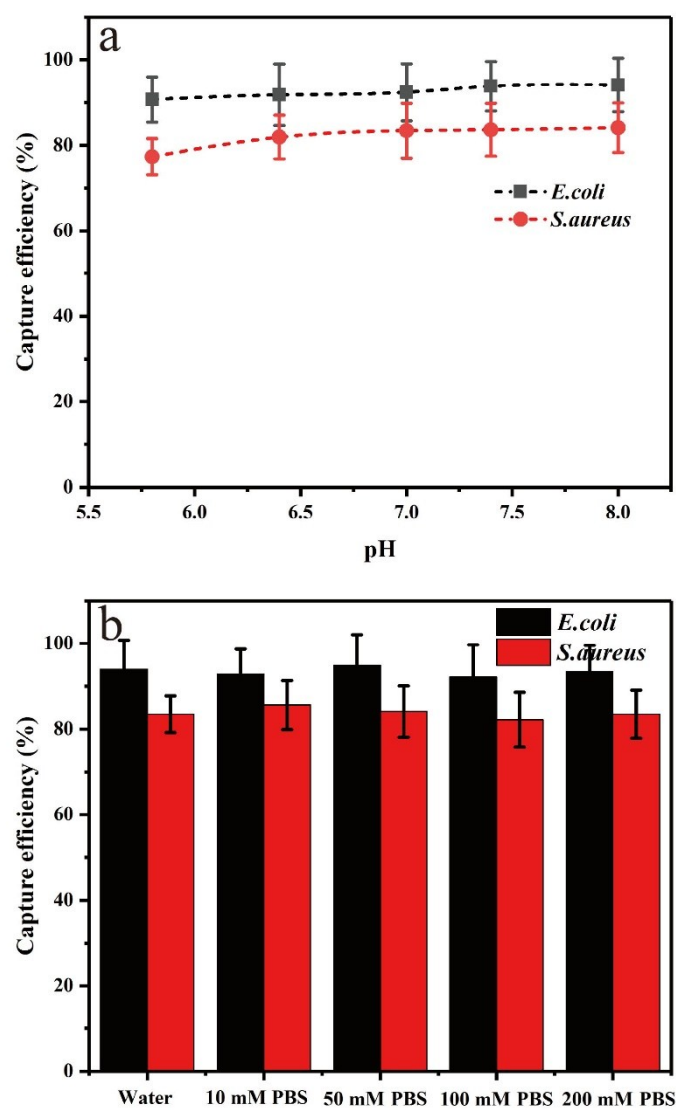

**Fig. S4** (a) The influence of pH (adjusted by 10 mM PBS buffer); (b) the influence of ionic strength on capture efficiency of prepared substrates.

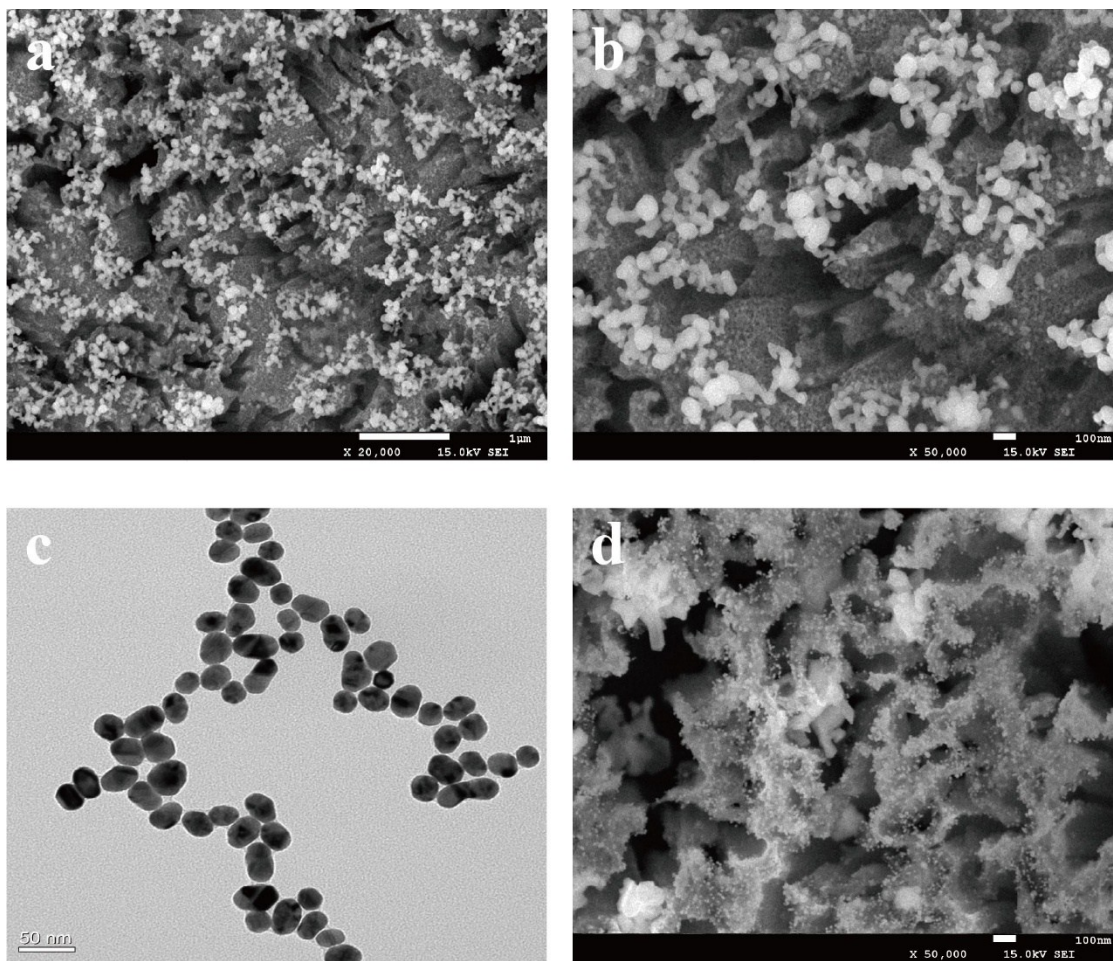

**Fig. S5** (a,b)SEM images of SiNWs-Ag; (c) TEM image of Au NPs; (d) SEM image of SiNWs-Au.

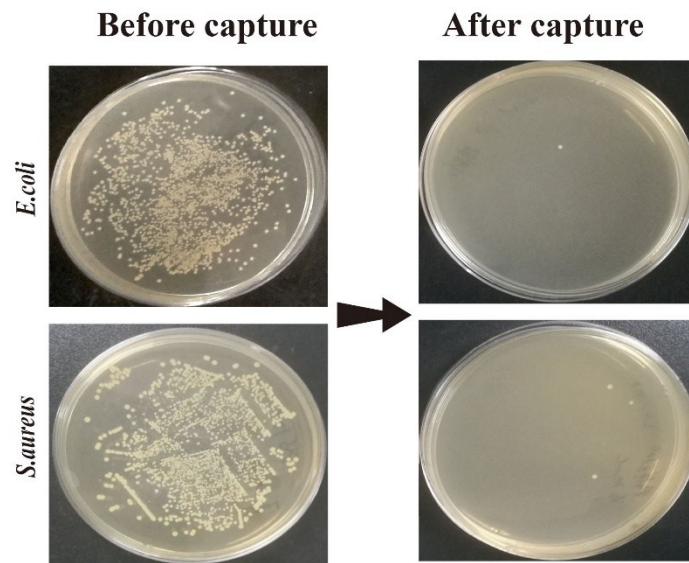

**Fig. S6** The representative bacteria growth images before and after capturing, *E.coli* and *S.aureus* with concentrations of  $\sim 1 \times 10^6$  CFU/mL.

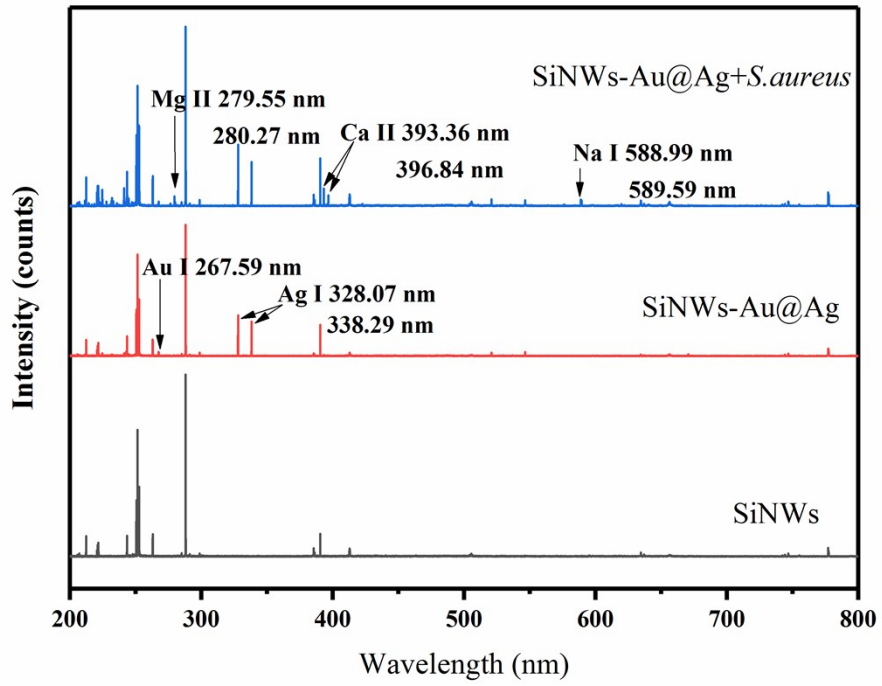

**Fig. S7** LIBS spectra of SiNWs, SiNWs-Au@Ag, and *S.aureus* ( $1 \times 10^6$  CFU/mL) captured by SiNWs-Au@Ag.

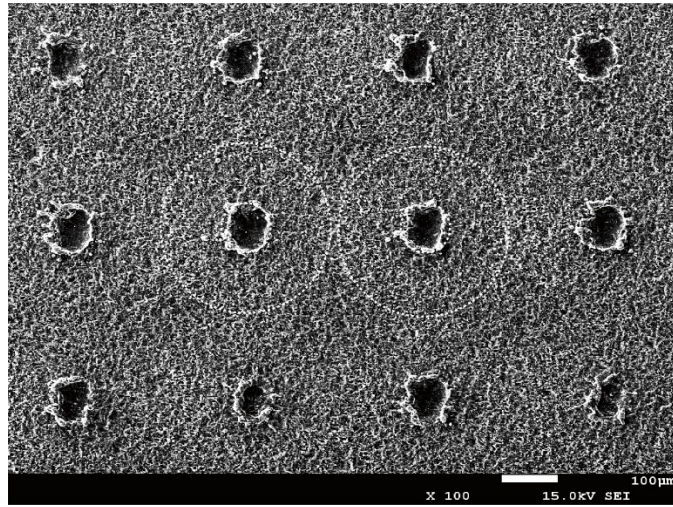

**Fig. S8** SEM image of the laser ablated craters and particle ejection after LIBS mapping.

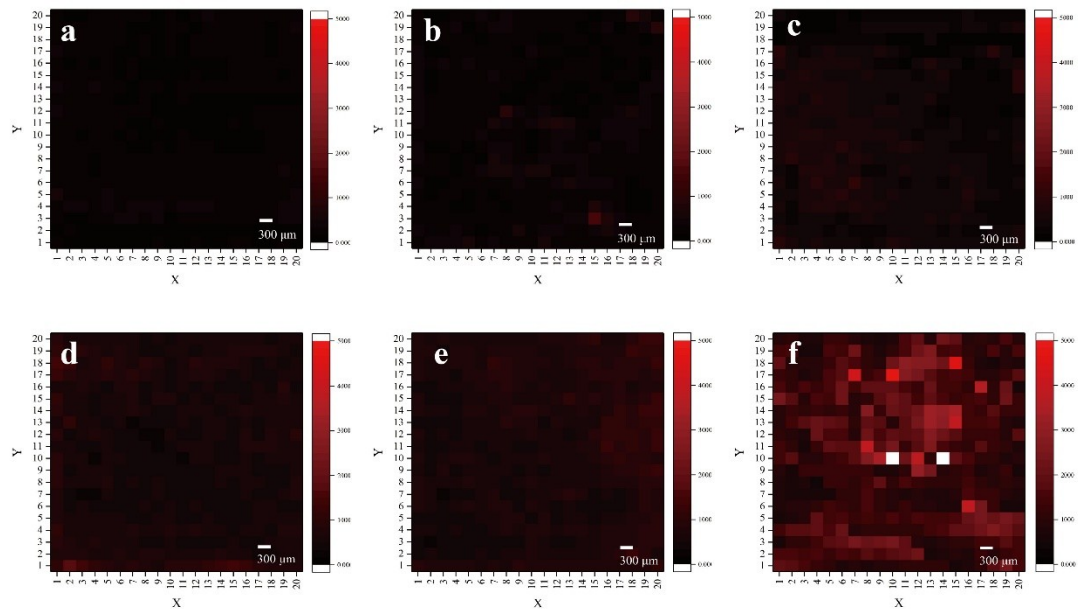

**Fig. S9** LIBS mapping of different concentrations of *S.aureus* captured by SiNWs-Au@Ag (a, 0 CFU/mL; b, 10 CFU/mL; c,  $10^2$  CFU/mL; d,  $10^3$  CFU/mL; e,  $10^4$  CFU/mL; f,  $10^5$  CFU/mL)

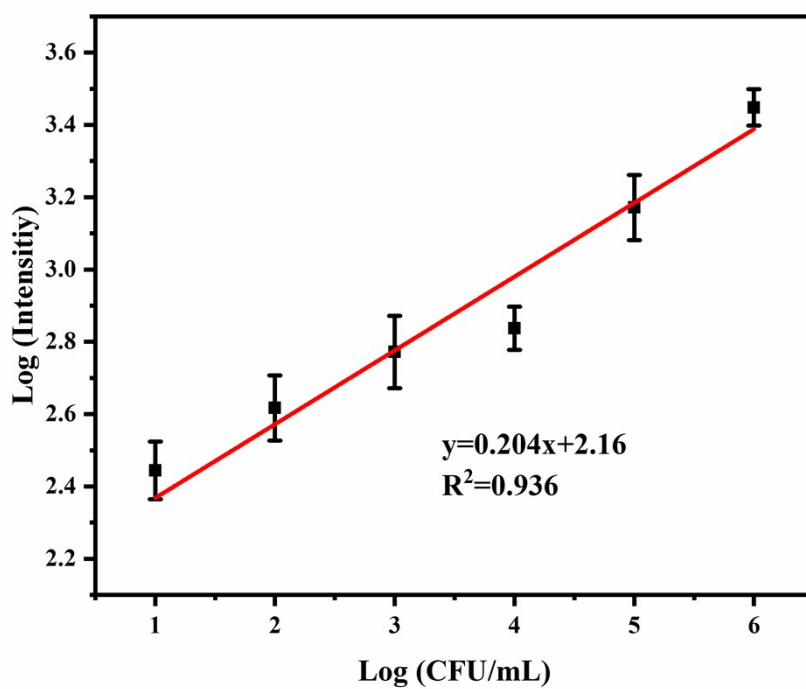

**Fig. S10** Linear fitting logarithm of average emission intensity and bacterial concentration

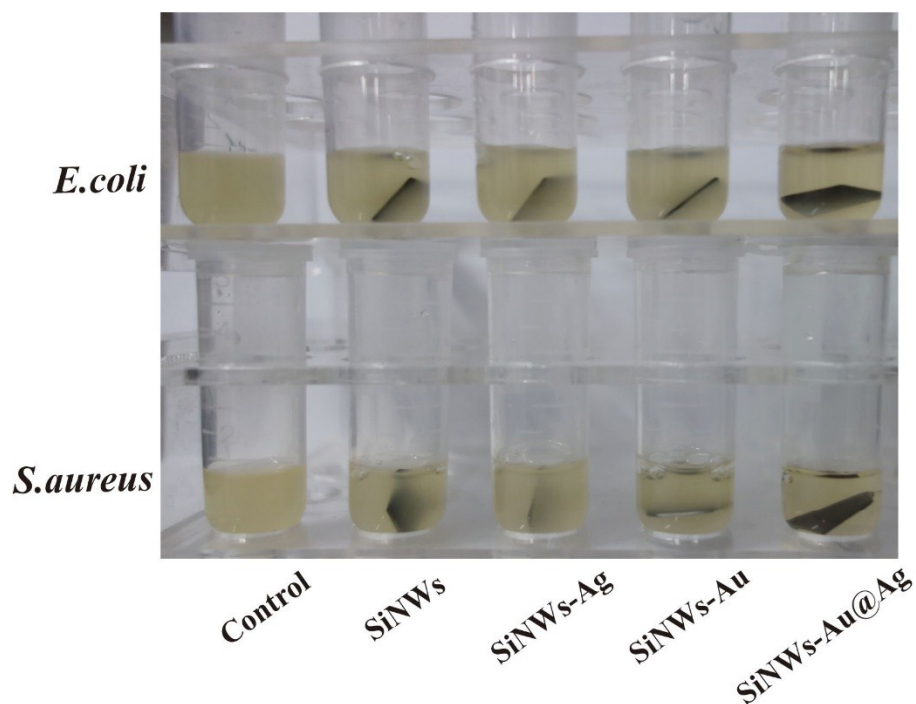

**Fig. S11** Photograph of *E.coli* and *S.aureus* growth medium treated with different substrates

### S3 References

1. J. Kimling, M. Maier, B. Okenve, V. Kotaidis, H. Ballot and A. Plech, *The Journal of Physical Chemistry B*, 2006, **110**, 15700-15707.
2. W. Haiss, N. T. K. Thanh, J. Aveyard and D. G. Fernig, *Anal Chem*, 2007, **79**, 4215-4221.
3. G. Xiao, Y. Li, W. Shi, L. Shen, Q. Chen and L. Huang, *Appl Surf Sci*, 2017, **404**, 334-341.
4. K. Kim, H. S. Han, I. Choi, C. Lee, S. Hong, S.-H. Suh, L. P. Lee and T. Kang, *Nat Commun*, 2013, **4**, 2182.
